# Supplementary material for: Pancreatic cancer survival analysis defines a signature that predicts outcome
Source: PubMed Central journal article supplement (PMC6084949; doi:10.1371/journal.pone.0201751), 2018-08-09

**A**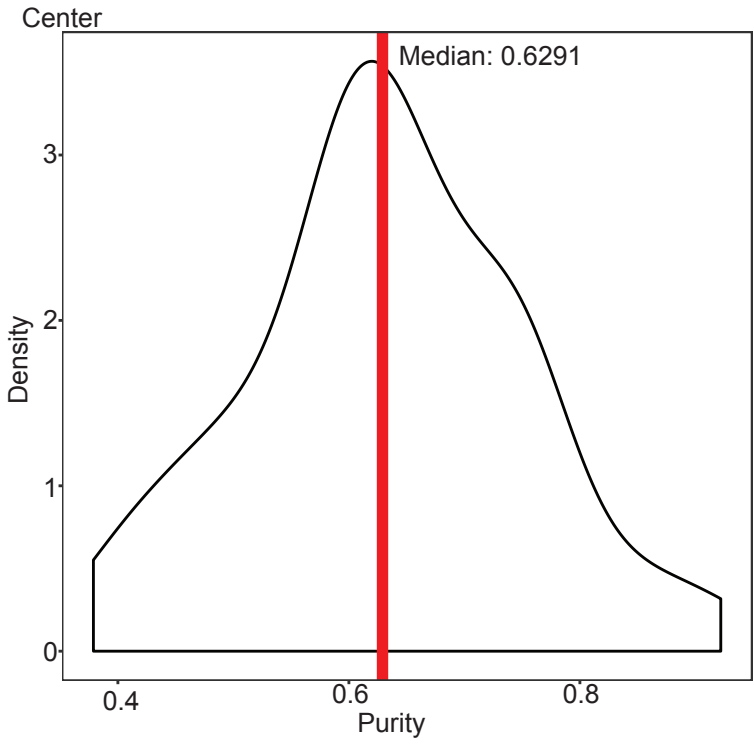**B**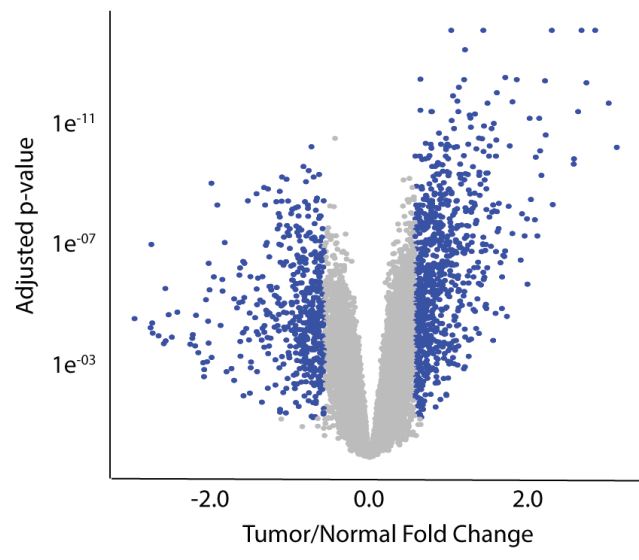**C**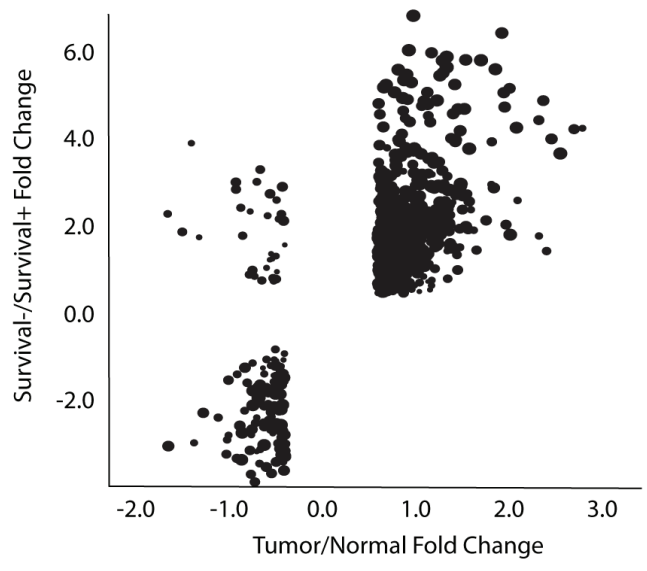

Supplement: pone.0201751.s004.pdf [file pone.0201751.s004.pdf]
