# Supplementary material for: Pancreatic cancer survival analysis defines a signature that predicts outcome
Source: PubMed Central journal article supplement (PMC6084949; doi:10.1371/journal.pone.0201751), 2018-08-09
Supplement: pone.0201751.s007.pdf [file pone.0201751.s007.pdf]

Sample ID: 716048

Sample ID: 1021055

ADM

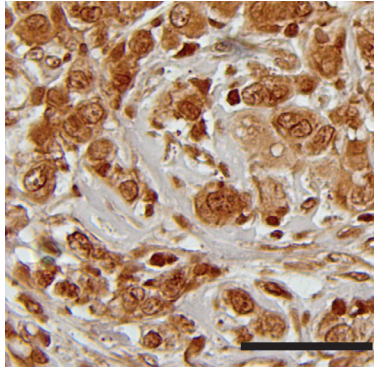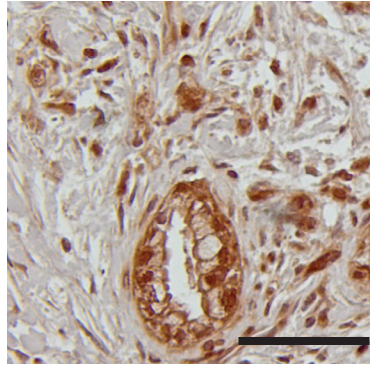

KRT6a

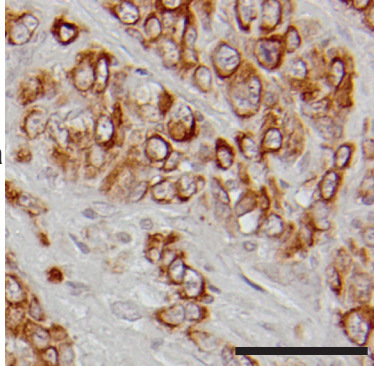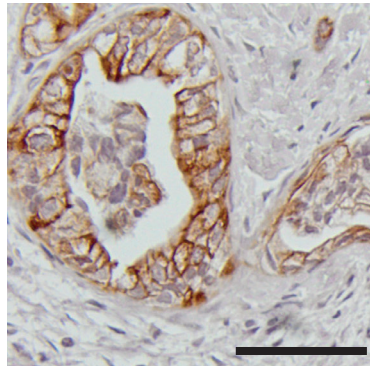

ASPM

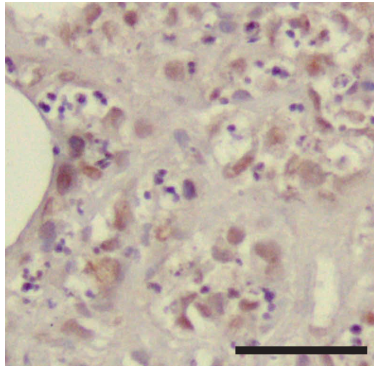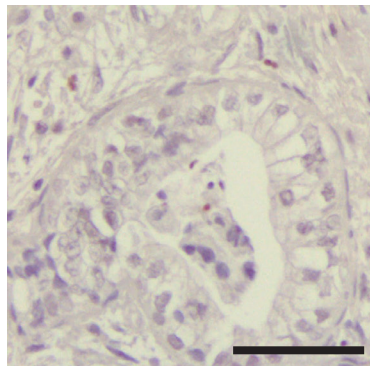

DCBLD2

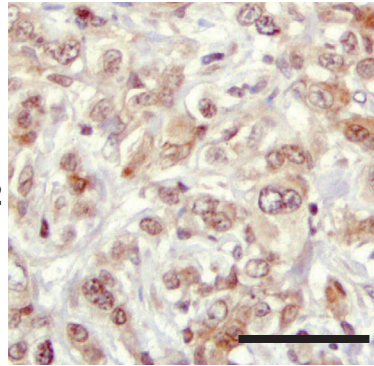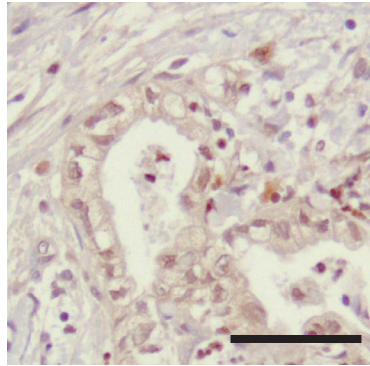

E2F7

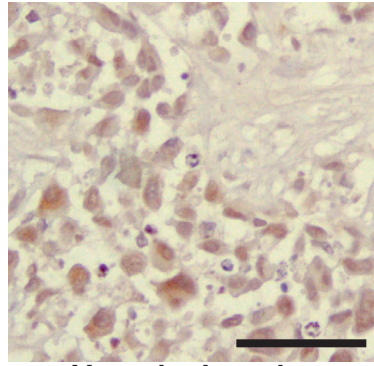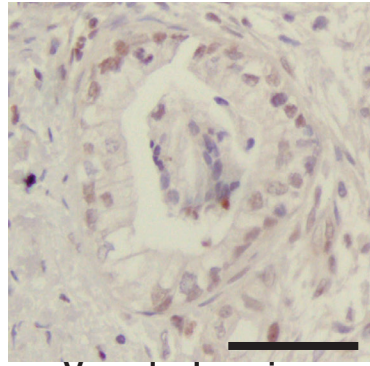

+ Vascular Invasion

- Vascular Invasion
